# Supplementary material
Source: PubMed Central journal article supplement (PMC3365376)
Supplement: 13148_2011_35_MOESM3_ESM.pdf [file 13148_2011_35_MOESM3_ESM.pdf]

**Table S1.** List of antibodies used

| <b>Antibodies</b> | <b>References</b>       |
|-------------------|-------------------------|
| Actin             | Chemicon#MAB1501R       |
| F1ATPase          | Mol Probe#A-21350       |
| Cytochrome C      | R&D System#MAB897       |
| Bad               | BD#610391               |
| pBad              | Cell Signaling#9296     |
| FoxO3a            | Cell Signaling#2497     |
| pFoxO3a           | Cell Signaling#9466     |
| Bcl-xl/s          | Tebu-Bio#sc-634         |
| Bcl-xl            | Transduction Lab#610212 |
| Bax               | Dako#A3533              |
| Bax 6A7           | Beckman Coulter#731731  |
| Bax2D2            | Sigma#B8554             |
| PUMA              | Sigma#P4743             |
| Akt1              | Cell Signaling#2967     |
| pAkt1             | Cell Signaling# 9271    |
| PDGFr $\beta$     | Tebu-Bio #sc-432        |
| I $\kappa$ B      | Cell Signaling#9247     |
| pI $\kappa$ B     | Cell Signaling#9246     |
| NF $\kappa$ B     | Tebu-Bio#sc-8008        |
| GFP               | Tebu-Bio#sc-9996        |
| Bcl-2             | Tebu-Bio#sc-783         |
| Mcl1              | Pharmingen#554103       |
| Bcl-w             | Calbiochem#197209       |
| Bim               | Cell Signaling#2933     |
| pBim              | Cell Signaling#458      |
| Bid               | R&D system#AF860        |
| Noxa              | Tebu-Bio#AP1316a        |
