# Supplementary material
Source: PubMed Central journal article supplement (PMC3365376)

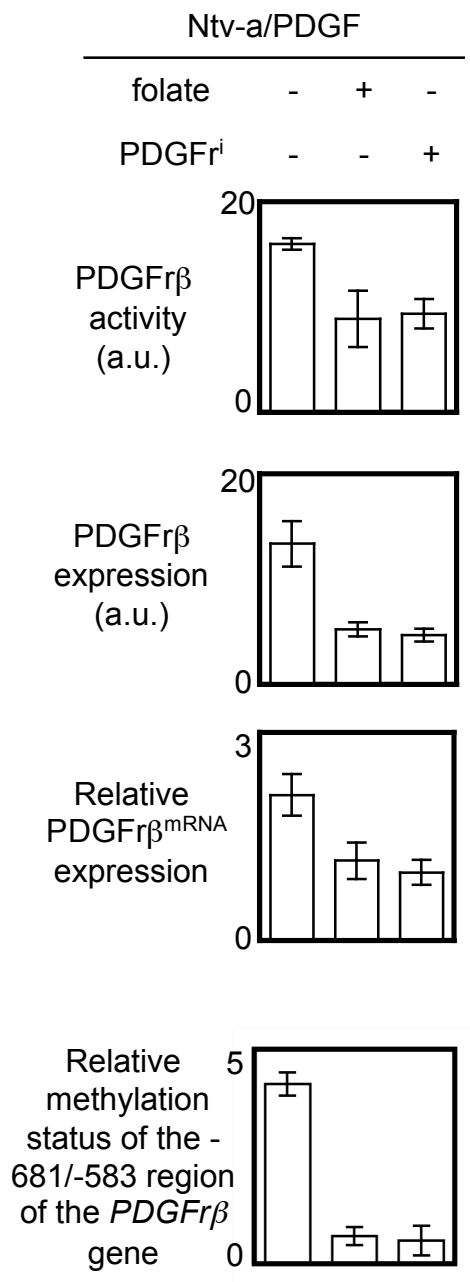

**Figure S1**

Supplement: 13148_2011_35_MOESM1_ESM.pdf [file 13148_2011_35_MOESM1_ESM.pdf]

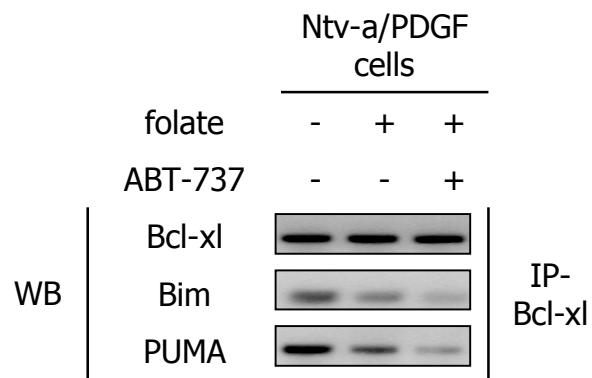

**Figure S2**

Supplement: 13148_2011_35_MOESM2_ESM.pdf [file 13148_2011_35_MOESM2_ESM.pdf]
